# Supplementary material for: Inequities in Self-Reported Social Risk Factors by Sexual Orientation and Gender Identity
Source: PubMed Central journal article supplement (PMC11437382; doi:10.1001/jamahealthforum.2024.3176), 2024-09-27
Supplement: jamahealthforum-e243176-s002.pdf [file jamahealthforum-e243176-s002.pdf]

## Data Sharing Statement

Nguyen. Inequities in Self-Reported Social Risk Factors by Sexual Orientation and Gender Identity. *JAMA Health Forum*. Published September 27, 2024.

doi:10.1001/jamahealthforum.2024.3176

### Data

**Data available:** No
